# Supplementary material for: Injectable supramolecular polymer–nanoparticle hydrogels enhance human mesenchymal stem cell delivery
Source: PubMed Central journal article supplement (PMC6971438; doi:10.1002/btm2.10147), 2019-10-22
Supplement: BTM2-5-e10147-s001.pdf [file BTM2-5-e10147-s001.pdf]

## Supplementary Information

### Injectable Supramolecular Polymer-Nanoparticle Hydrogels Enhance Human Mesenchymal Stem Cell Delivery

Abigail K. Grosskopf<sup>1</sup>, Gillie A. Roth<sup>2</sup>, Anton A. Smith<sup>3</sup>, Emily C. Gale<sup>4</sup>, Hector Lopez Hernandez<sup>3</sup>, Eric A. Appel<sup>3,\*</sup>

1. Department of Chemical Engineering, Stanford University, Stanford, CA 94305

2. Department of Bioengineering, Stanford University, Stanford, CA 94305

3. Department of Materials Science & Engineering, Stanford University, Stanford, CA 94305

4. Department of Biochemistry, Stanford University, Stanford, CA 94305

\* Denotes Corresponding Authorship: eappel@stanford.edu

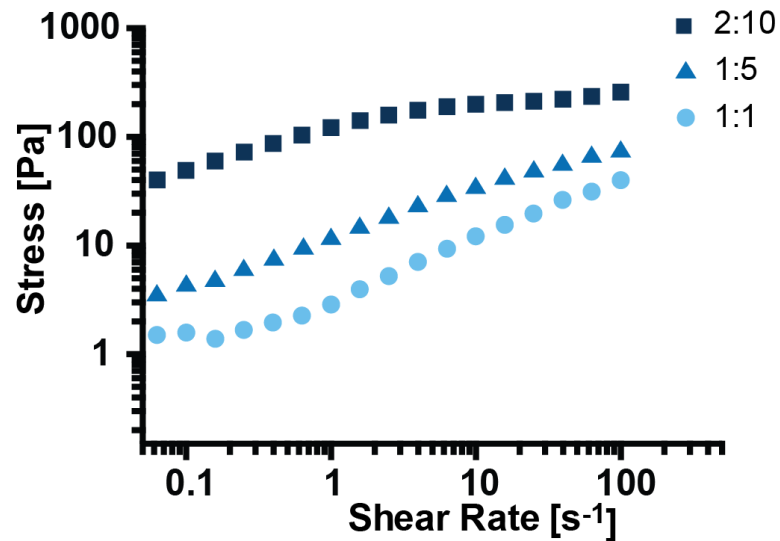

**Figure S1:** Steady shear rate sweeps from low to high shear rate of various PNP formulations. Stress as a function of shear rate.

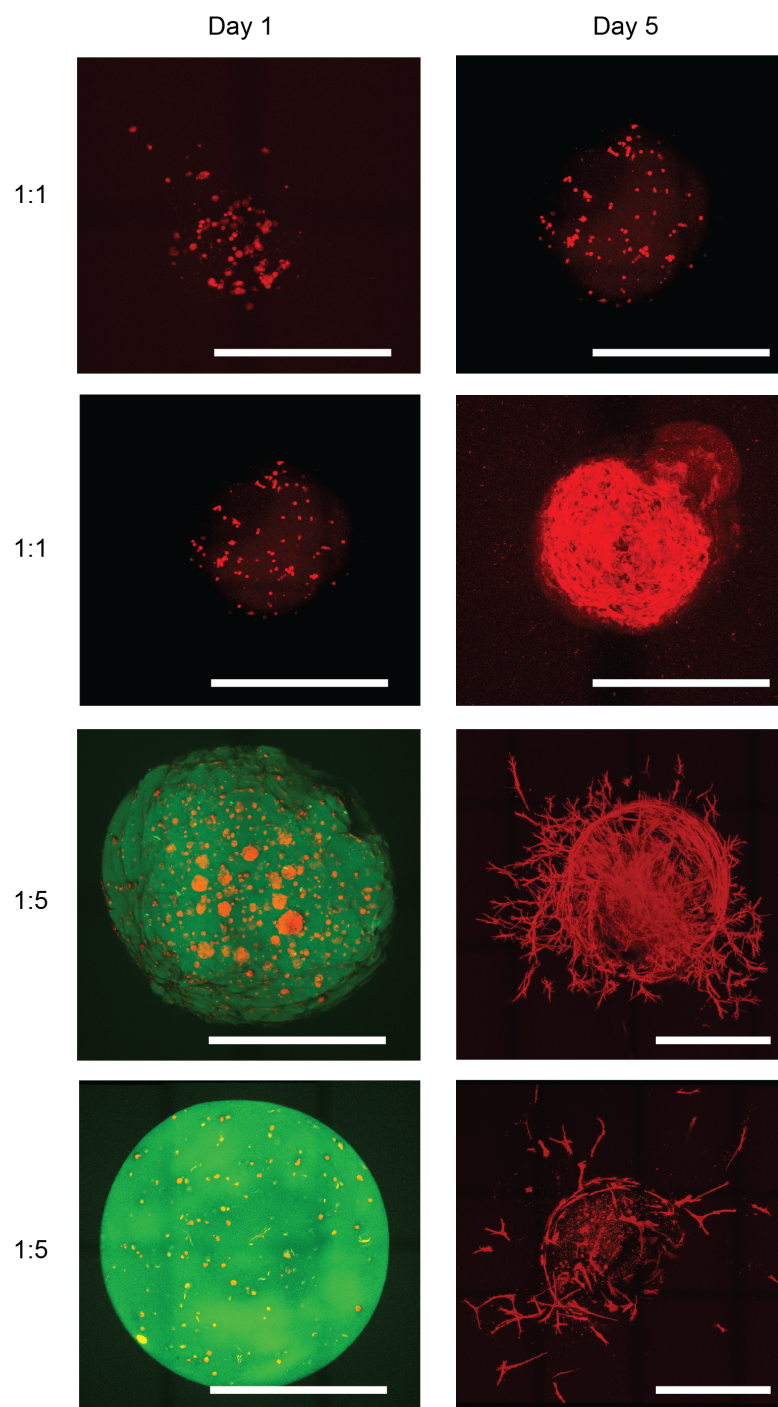

**Figure S2:** Maximum intensity confocal images of hMSCs encapsulated and delivered in 1:1 and 1:5 PNP hydrogels into collagen hydrogels across a 500  $\mu\text{m}$  z-stack. Cellular actin is stained with TRITC phalloidin (red) and the HPMC-C<sub>12</sub> is modified with 1 wt% FITC (green). Images are from below. All scale bars represents 500  $\mu\text{m}$ .

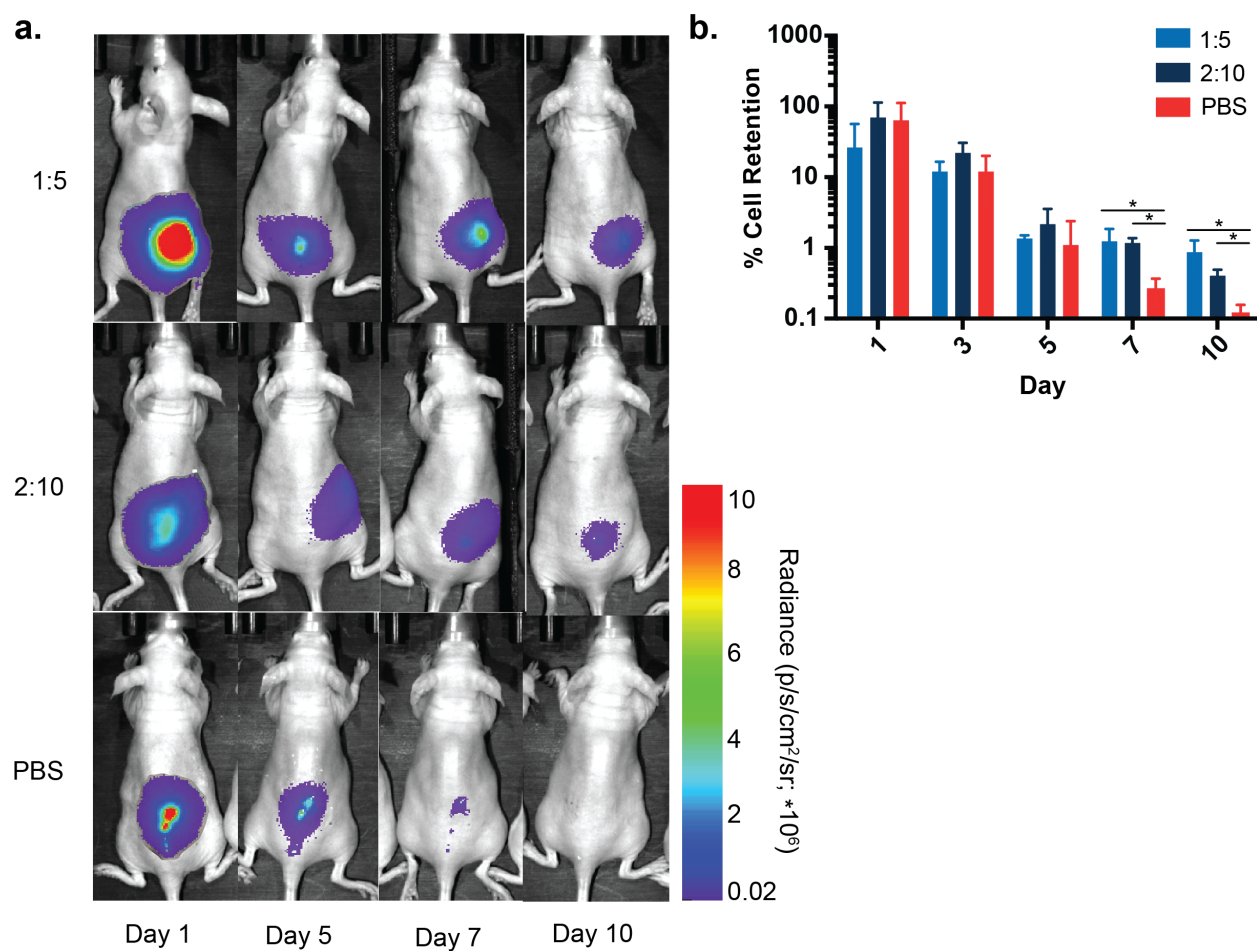

**Figure S3:** **a.** Representative images of hMSC cell retention in athymic nude mice across 10 days in PNP formulations and a bolus control. **b.** Proportion of initial cells retained locally over time (data shown as mean  $\pm$  s.d.;  $n=3$ ).

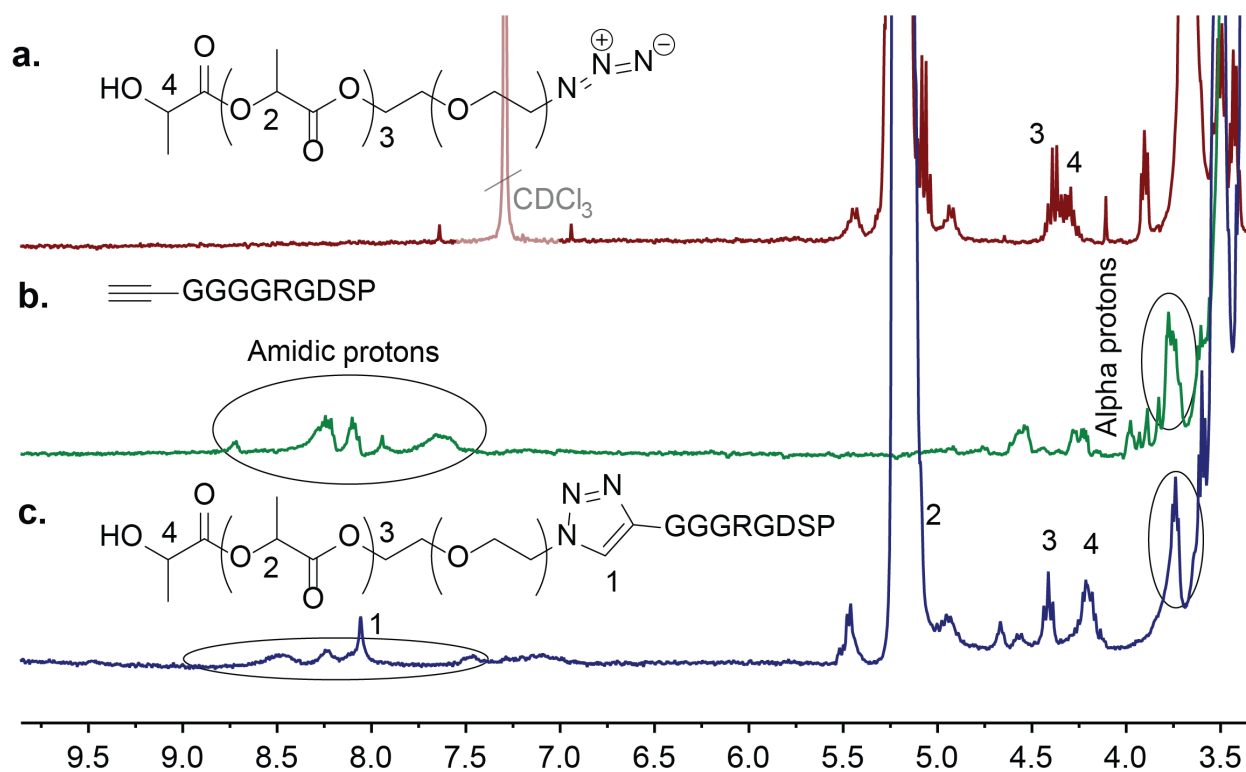

**Figure S4:** a. <sup>1</sup>H-NMR (CDCl<sub>3</sub>) of N<sub>3</sub>-PEG-PLA. b. <sup>1</sup>H-NMR (DMSO-*d*<sub>6</sub>) of propargylglycine-GGGRGDSP. c. <sup>1</sup>H-NMR (DMSO-*d*<sub>6</sub>) of RGD-PEG-PLA copolymer showing the emergence of the triazole proton at 8.05 ppm, indicating coupling of the RGD moiety to the PEG-PLA polymer.
